# Supplementary material for: ReefMedMol: Mollusca from the infralittoral rocky shores - the biocoenosis of photophilic algae - in the Mediterranean Sea
Source: Biodivers Data J. 2016 Jul 6;(4):e7516. doi: 10.3897/BDJ.4.e7516 (PMC5136646; doi:10.3897/BDJ.4.e7516)
Supplement: Supplementary material 1 — Number of Species per Family [file biodiversity_data_journal-4-e7516-s001.xlsx]

## Sheet: Query1
Family	CountOfFamily
Gastrochaenidae	1
Pandoridae	1
Clavatulidae	1
Callistoplacidae	1
Gryphaeidae	1
Phyllidiidae	1
Pinnidae	1
Barleeiidae	1
Planaxidae	1
Onchidorididae	1
Bursidae	1
Potamididae	1
Proctonotidae	1
Lottiidae	1
Pteriidae	1
Ovulidae	1
Galeommatidae	1
Glycymerididae	1
Calmidae	1
Chilodontidae	1
Volvatellidae	1
Mitridae	1
Montacutidae	1
Murchisonellidae	1
Clavagellidae	1
Myidae	1
Horaiclavidae	1
Kelliidae	1
Iravadiidae	1
Neoleptonidae	1
Noetiidae	1
Nuculanidae	1
Nuculidae	1
Octopodidae	1
Callochitonidae	1
Bullidae	1
Capulidae	1
Truncatellidae	1
Thraciidae	1
Psammobiidae	1
Thyasiridae	1
Tofanellidae	1
Tornidae	1
Trapezidae	1
Architectonicidae	1
Drilliidae	1
Ellobiidae	1
Turbinidae	1
Cylichnidae	1
Tylodinidae	1
Umbraculidae	1
Vanikoridae	1
Aegiridae	1
Acteonidae	1
Amathinidae	1
Skeneidae	1
Colubrariidae	1
Conidae	1
Anatomidae	1
Anomiidae	1
Strombidae	1
Rissoinidae	1
Siphonariidae	1
Sepiidae	1
Skeneopsidae	1
Fustiariidae	1
Solecurtidae	1
Rhizoridae	1
Solenidae	1
Spondylidae	1
Colloniidae	1
Limapontiidae	2
Littorinidae	2
Corbulidae	2
Donacidae	2
Ischnochitonidae	2
Goniodorididae	2
Haliotidae	2
Hiatellidae	2
Dentaliidae	2
Pleurobranchidae	2
Turritellidae	2
Aglajidae	2
Tritoniidae	2
Anabathridae	2
Scissurellidae	2
Ringiculidae	2
Ranellidae	2
Philinidae	2
Pharidae	2
Acanthochitonidae	2
Neritidae	2
Oxynoidae	2
Runcinidae	3
Dendrodorididae	3
Cingulopsidae	3
Discodorididae	3
Triviidae	3
Chamidae	3
Tergipedidae	3
Leptochitonidae	3
Plakobranchidae	3
Clathurellidae	3
Rissoellidae	3
Ostreidae	3
Chitonidae	3
Cypraeidae	3
Patellidae	3
Mactridae	3
Facelinidae	3
Carditidae	4
Costellariidae	4
Calyptraeidae	4
Calliostomatidae	4
Marginellidae	4
Epitoniidae	4
Omalogyridae	4
Semelidae	4
Flabellinidae	4
Polyceridae	4
Lasaeidae	4
Caecidae	5
Cystiscidae	5
Lucinidae	5
Naticidae	5
Lepidochitonidae	5
Mitromorphidae	5
Chromodorididae	5
Vermetidae	5
Columbellidae	6
Arcidae	6
Retusidae	6
Haminoeidae	6
Limidae	6
Pectinidae	7
Phasianellidae	7
Eulimidae	7
Aplysiidae	7
Tellinidae	8
Fasciolariidae	8
Triphoridae	9
Nassariidae	10
Mangeliidae	11
Cardiidae	11
Fissurellidae	11
Cerithiidae	12
Cerithiopsidae	12
Raphitomidae	13
Buccinidae	15
Muricidae	15
Veneridae	16
Mytilidae	20
Trochidae	27
Pyramidellidae	38
Rissoidae	56
