# Supplementary material for: ReefMedMol: Mollusca from the infralittoral rocky shores - the biocoenosis of photophilic algae - in the Mediterranean Sea
Source: Biodivers Data J. 2016 Jul 6;(4):e7516. doi: 10.3897/BDJ.4.e7516 (PMC5136646; doi:10.3897/BDJ.4.e7516)
Supplement: Supplementary material 2 — Species and Families per studied site [file biodiversity_data_journal-4-e7516-s002.xlsx]

## Sheet: Query1
Location	Number of species	Number of families
Marseille area	38	25
Pelagos - Piperi - Gioura	46	29
Capo Madonna, Lampedusa Island	54	25
Gulf or Trieste	60	31
Vlora bay	69	25
Bay of Algeciras	72	39
Islas Medes	80	42
Torre del Serpe	80	34
Ionian coast of Salento	83	41
Calvi	85	43
Isola Bella	87	46
Lampedusa	98	31
Izmir bay	101	30
Gulf of Castellammare	115	64
Otranto	131	66
Ustica island	148	65
South-western coast of Apulia	150	65
Chalkidiki peninsula	221	76
Tunis town	281	73
